# Supplementary material
Source: PubMed Central journal article supplement (PMC3222526)

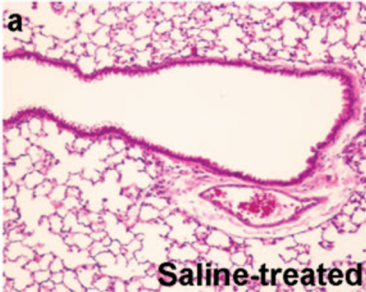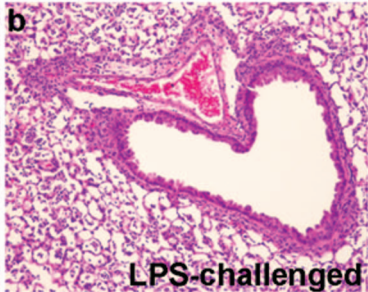

Supplement: mt2011160x1.pdf [file mt2011160x1.pdf]

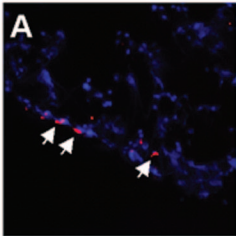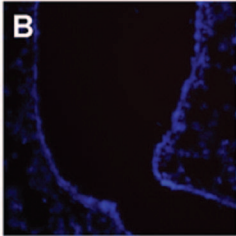

Supplement: mt2011160x2.pdf [file mt2011160x2.pdf]
